# Supplementary material for: Polymer–DNA assembled nanoflower for targeted delivery of dolastatin-derived microtubule inhibitors
Source: Royal Society of Chemistry journal article supplement (doi:10.1039/d3ra08146j), 2024-01-01
Supplement: d3ra08146j1.pdf [file d3ra08146j1.pdf]

## **Polymer-DNA assembled Nanoflower for Targeted Delivery of Dolastatin-Derivatived Microtubule Inhibitors**

Tiantian Wu,<sup>§a, b</sup> Yanqiang Shi,<sup>§ a</sup> Tao Yang,<sup>b</sup> Pengxuan Zhao,<sup>\*b</sup> Zhu Yang,<sup>\*c,d</sup> and Bin Yang<sup>\*a</sup>

- a. Molecular Diagnosis and Treatment Center for Infectious Diseases. Dermatology Hospital. Southern Medical University. Guangzhou 510091, China.
- b. Department of Neurosurgery, Hainan General Hospital/Hainan Affiliated Hospital of Hainan Medical University, Haikou, 570311, China.
- c. Department of Neurosurgery, Neurosurgery Research Institute, the First Affiliated Hospital of Fujian Medical University, Fuzhou, 350005, China.
- d. Department of Neurosurgery, National Regional Medical Center, Binhai Campus of the First Affiliated Hospital of Fujian Medical University, Fuzhou, 350212, China.

## Supplementary Data

**Table S1.** Drug loading performance of the nanoflower.

| Name of the nanoflower | Drug (MW) | LC <sup>1</sup> (μg/mL) | EE <sup>2</sup> % | Diameter (μm) |
|------------------------|-----------|-------------------------|-------------------|---------------|
| PN@PE                  | 701.98    | 433 ± 19                | 86.5 ± 3.8        | 1.74 ± 0.58   |
| PN@D-10                | 785.09    | 407 ± 23                | 81.3 ± 4.6        | 1.33 ± 0.31   |
| PN@MMAE                | 731.96    | 351 ± 34                | 75.1 ± 6.8        | 1.16 ± 0.48   |
| PN@MMAE (PN@M)         | 717.98    | 426 ± 25                | 85.6 ± 5.0        | 0.92 ± 0.29   |

**Table S2.** DNA sequences of the template.

| Name                     | Sequence (5'-3')                                                                                    |
|--------------------------|-----------------------------------------------------------------------------------------------------|
| <b>Template</b>          | Phosphate-<br>CATATCCCTAGGGATATGTCTAACCGTACAGTATTTTCCCGGCGG<br>CGCAGCAGTTAGATTTGTTGGTACGTTAATACGACT |
| <b>Anti-Sgc8 aptamer</b> | ATCTAACTGCTGCGCCGCCGGGAAAATACTGTA                                                                   |
| <b>Cy5-aptamer</b>       | Cy5-ATCTAACTGCTGCGCCGCCGGGAAAATACTGTA                                                               |

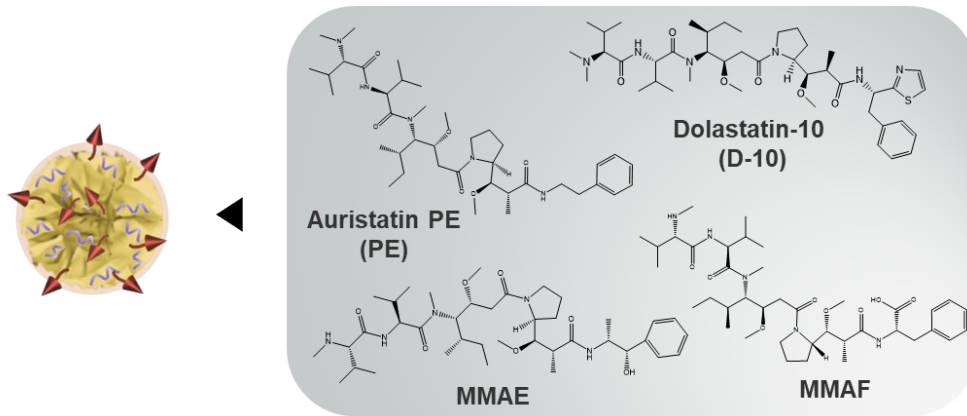

**Figure 1.** Illustration of the drug-loaded nanoflower.

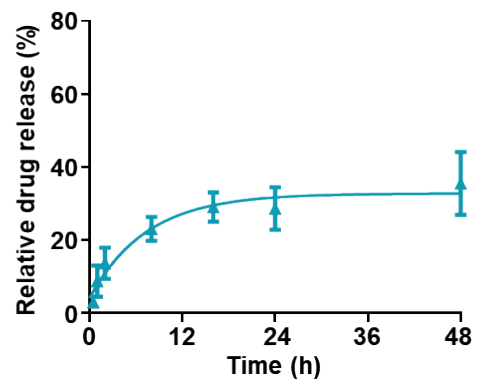

**Figure 2.** Release of MMAE in PBS at 37 °C.

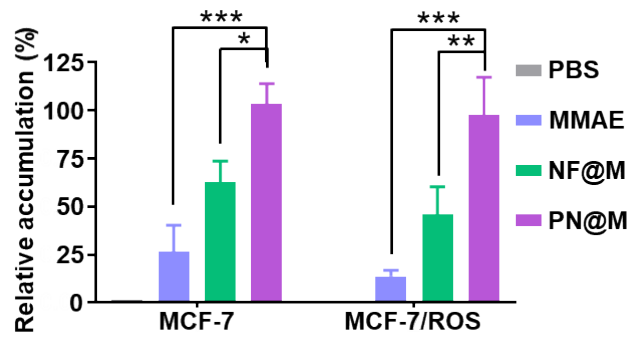

**Figure 3.** Relative MMAE accumulation in cells. The accumulation efficacy was measured by quantifying MMAE through HPLC. (\*\* P < 0.01; \*\*\* P < 0.001; \*\*\*\* P < 0.0001).

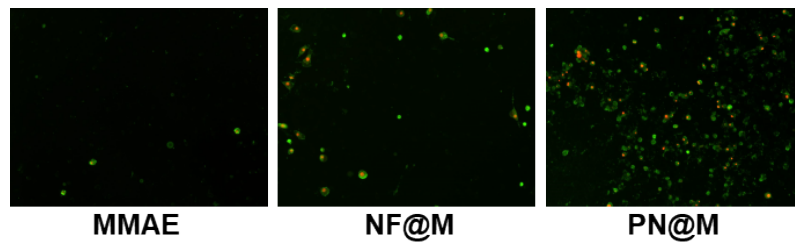

**Figure 4.** Cell apoptosis imaging. MCF-7/ROS cells were stained with Annexin V-FITC and PI after being cultured with different drugs.

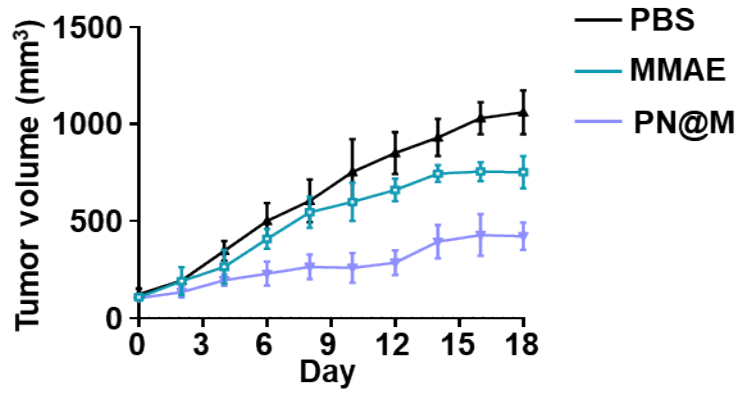

**Figure 4.** Tumor volume changes during the treatment of different drugs.
